# Supplementary material for: The excited states and vibronic spectroscopy of diphenyldiacetylene and diphenylvinylacetylene
Source: Royal Society of Chemistry journal article supplement (doi:10.1039/c1cp22857a), 2011-11-09
Supplement: c1cp22857a.pdf [file c1cp22857a.pdf]

# The Excited States and Vibronic Spectroscopy of Diphenyldiacetylene and Diphenylvinylacetylene

Joshua A. Sebree,<sup>a</sup> and Timothy S. Zwier<sup>b\*</sup>

<sup>a</sup> Goddard Space Flight Center, Greenbelt, MD, 20771

<sup>b</sup>Department of Chemistry, Purdue University, West Lafayette, IN 47907-2084 U.S.A.

## Supporting Information

### Contents

**Figure S1.** LIF scan over the origin region of DPDA using a series of blue cut-off filters in front of the PMT. It was found that there is still detectable emission over 10,000 cm<sup>-1</sup> to the red of the excitation wavelength.

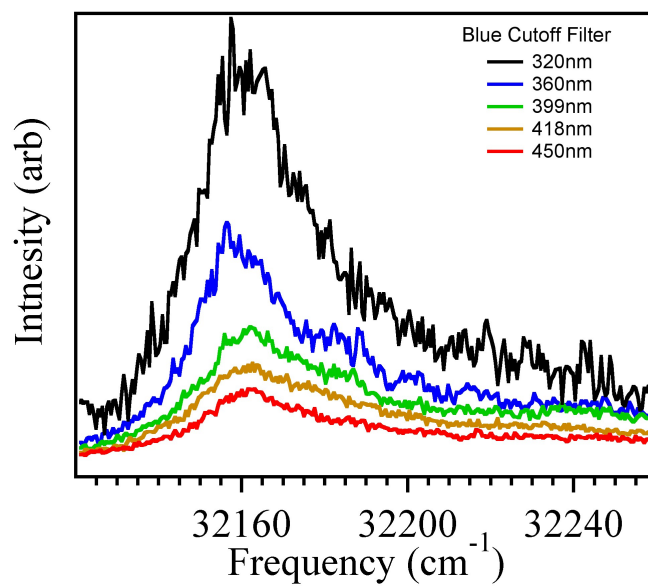

Figure S1 LIF scan over the origin region of DPDA using a series of blue cut-off filters in front of the PMT. It was found that there is still detectable emission over  $10,000\text{ cm}^{-1}$  to the red of the excitation wavelength.
